# Supplementary material for: U-CAN-seq: A Universal Competition Assay by Nanopore Sequencing
Source: Viruses. 2024 Apr 19;16(4):636. doi: 10.3390/v16040636 (PMC11054411; doi:10.3390/v16040636)
Supplement: Supplementary file 1 [file viruses-16-00636-s001.zip › viruses-2919005-suppl Table S1.xlsx]

## Sheet: Sheet1
Table S1. K-mer search tolerating single-nucleotide mismatch.
Experiment number	Genotype of interest	bp of kmer	Sample	Count exact WT	Count mismatch WT	Count exact mut	Count mismatch mut	Percent mismatch WT	Percent mismatch mut	Percent mismatch per bp	mut freq	total reads
119	N24A	25	WTonlyin1	919	0	0	0	0		0	0	919
119	N24A	25	WTonlyin2	837	0	0	0	0		0	0	837
119	N24A	25	WTonlyin3	497	0	0	0	0		0	0	497
119	N24A	25	WTonlyA	1352	0	3	0	0	0	0	0.00221402	1355
119	N24A	25	N24Aonlyin1	0	0	1155	0		0	0	1	1155
119	N24A	25	N24Aonlyin2	2	0	1097	0	0	0	0	0.99818	1099
119	N24A	25	N24Aonlyin3	2	0	865	0	0	0	0	0.997693	867
119	N24A	25	N24AonlyA	1	0	688	0	0	0	0	0.998549	689
119	N24A	25	1to1in1	35	0	298	0	0	0	0	0.894895	333
119	N24A	25	1to1in2	18	0	249	0	0	0	0	0.932584	267
119	N24A	25	1to1in3	35	0	247	0	0	0	0	0.875887	282
119	N24A	25	1to1A	653	0	756	0	0	0	0	0.536551	1409
119	N24A	25	1to1B	194	0	269	0	0	0	0	0.580994	463
119	N24A	25	1to1C	227	0	310	0	0	0	0	0.577281	537
119	N24A	25	1to1D	494	0	610	0	0	0	0	0.552536	1104
119	N24A	25	1to1E	403	0	615	0	0	0	0	0.604126	1018
119	N24A	25	5to1in1	228	0	360	0	0	0	0	0.612245	588
119	N24A	25	5to1in2	572	0	671	0	0	0	0	0.539823	1243
119	N24A	25	5to1in3	549	0	817	0	0	0	0	0.598097	1366
119	N24A	25	5to1A	600	1	71	0	0.166389	0	0.00596125	0.105655	672
119	N24A	25	5to1B	873	0	139	0	0	0	0	0.137352	1012
119	N24A	25	5to1C	158	0	257	0	0	0	0	0.619277	415
119	N24A	25	5to1D	61	0	46	0	0	0	0	0.429907	107
119	N24A	25	5to1E	403	0	13	0	0	0	0	0.03125	416
119	N24A	25	10to1in1	691	0	588	0	0	0	0	0.459734	1279
119	N24A	25	10to1in2	552	0	439	0	0	0	0	0.442987	991
119	N24A	25	10to1in3	491	0	432	0	0	0	0	0.468039	923
119	N24A	25	10to1A	0	0	0	0					0
119	N24A	25	10to1B	1	0	0	0	0		0	0	1
119	N24A	25	10to1C	263	0	84	0	0	0	0	0.242075	347
119	N24A	25	10to1D	1162	0	130	0	0	0	0	0.100619	1292
119	N24A	25	10to1E	1429	0	283	0	0	0	0	0.165304	1712
148	scrSL3	31	WTonlyin1	23	0	0	0	0		0	0	23
148	scrSL3	31	WTonlyin2	35	0	0	0	0		0	0	35
148	scrSL3	31	WTonlyin3	22	0	0	0	0		0	0	22
148	scrSL3	31	WTonlyA	23	1	0	0	4.16667		0.140252	0	24
148	scrSL3	31	scrSL3onlyin1	0	0	12	1		7.69231	0.268817	1	13
148	scrSL3	31	scrSL3onlyin2	0	0	17	0		0	0	1	17
148	scrSL3	31	scrSL3onlyin3	0	0	30	0		0	0	1	30
148	scrSL3	31	scrSL3onlyA	0	0	30	0		0	0	1	30
148	scrSL3	31	1to1in1	2	0	2	0	0	0	0	0.5	4
148	scrSL3	31	1to1in2	3	1	6	0	25	0	0.358423	0.6	10
148	scrSL3	31	1to1in3	10	0	15	0	0	0	0	0.6	25
148	scrSL3	31	1to1A	31	1	2	0	3.125	0	0.0977517	0.0588235	34
148	scrSL3	31	1to1B	23	0	2	0	0	0	0	0.08	25
148	scrSL3	31	1to1C	28	0	4	0	0	0	0	0.125	32
148	scrSL3	31	1to1D	48	1	5	0	2.04082	0	0.0608643	0.0925926	54
148	scrSL3	31	1to1E	14	0	0	0	0		0	0	14
148	scrSL3	31	5to1in1	12	0	3	0	0	0	0	0.2	15
148	scrSL3	31	5to1in2	23	1	2	0	4.16667	0	0.129032	0.0769231	26
148	scrSL3	31	5to1in3	26	0	6	1	0	14.2857	0.100806	0.212121	33
148	scrSL3	31	5to1A	6	0	0	0	0		0	0	6
148	scrSL3	31	5to1B	55	1	1	0	1.78571	0	0.0576037	0.0175439	57
148	scrSL3	31	5to1C	54	0	5	1	0	16.6667	0.0546747	0.1	60
148	scrSL3	31	5to1D	58	0	1	0	0	0	0	0.0169492	59
148	scrSL3	31	5to1E	43	0	0	0	0		0	0	43
148	scrSL3	31	10to1in1	33	2	0	1	5.71429	100	0.293255	0.0277778	36
148	scrSL3	31	10to1in2	0	0	0	0					0
148	scrSL3	31	10to1in3	30	1	3	0	3.22581	0	0.0977517	0.0882353	34
148	scrSL3	31	10to1A	17	0	1	0	0	0	0	0.0555556	18
148	scrSL3	31	10to1B	52	1	0	0	1.88679		0.0620347	0	53
148	scrSL3	31	10to1C	38	2	1	0	5	0	0.165426	0.0243902	41
148	scrSL3	31	10to1D	10	0	0	0	0		0	0	10
148	scrSL3	31	10to1E	11	0	0	0	0		0	0	11
148	scr5'CSE	43	WTonlyin1	86	1	0	0	1.14943		0.0270416	0	87
148	scr5'CSE	43	WTonlyin2	147	2	0	0	1.34228		0.0316406	0	149
148	scr5'CSE	43	WTonlyin3	88	0	0	0	0		0	0	88
148	scr5'CSE	43	WTonlyA	73	0	0	0	0		0	0	73
148	scr5'CSE	43	scr5' CSEonlyin1	0	0	237	0		0	0	1	237
148	scr5'CSE	43	scr5' CSEonlyin2	0	0	66	0		0	0	1	66
148	scr5'CSE	43	scr5' CSE onlyin3	0	0	7	0		0	0	1	7
148	scr5'CSE	43	scr5' CSE onlyA	0	0	192	0		0	0	1	192
148	scr5'CSE	43	1to1in1	85	0	62	0	0	0	0	0.421769	147
148	scr5'CSE	43	1to1in2	87	0	64	0	0	0	0	0.423841	151
148	scr5'CSE	43	1to1in3	48	0	54	0	0	0	0	0.529412	102
148	scr5'CSE	43	1to1A	100	3	99	0	2.91262	0	0.035059	0.490099	202
148	scr5'CSE	43	1to1B	31	0	32	0	0	0	0	0.507937	63
148	scr5'CSE	43	1to1C	64	0	42	0	0	0	0	0.396226	106
148	scr5'CSE	43	1to1D	72	0	78	0	0	0	0	0.52	150
148	scr5'CSE	43	1to1E	36	0	29	0	0	0	0	0.446154	65
148	scr5'CSE	43	5to1in1	21	0	2	0	0	0	0	0.0869565	23
148	scr5'CSE	43	5to1in2	112	0	8	0	0	0	0	0.0666667	120
148	scr5'CSE	43	5to1in3	70	0	9	0	0	0	0	0.113924	79
148	scr5'CSE	43	5to1A	101	1	6	0	0.980392	0	0.0217344	0.0555556	108
148	scr5'CSE	43	5to1B	83	0	9	0	0	0	0	0.0978261	92
148	scr5'CSE	43	5to1C	87	0	8	0	0	0	0	0.0842105	95
148	scr5'CSE	43	5to1D	88	1	10	0	1.1236	0	0.0237304	0.10101	99
148	scr5'CSE	43	5to1E	62	1	7	0	1.5873	0	0.0337041	0.1	70
148	scr5'CSE	43	10to1in1	125	1	3	0	0.793651	0	0.0181686	0.0232558	129
148	scr5'CSE	43	10to1in2	71	0	4	0	0	0	0	0.0533333	75
148	scr5'CSE	43	10to1in3	127	0	1	0	0	0	0	0.0078125	128
148	scr5'CSE	43	10to1A	270	1	15	0	0.369004	0	0.00815993	0.0524476	286
148	scr5'CSE	43	10to1B	228	0	14	0	0	0	0	0.0578512	242
148	scr5'CSE	43	10to1C	136	0	0	0	0		0	0	136
148	scr5'CSE	43	10to1D	167	0	4	0	0	0	0	0.0233918	171
148	scr5'CSE	43	10to1E	67	1	4	0	1.47059	0	0.0327547	0.0555556	72
								Percent mismatch total
Sums	All			17164	25	12706	4	0.0970874
	N24a			13702	1	11492	0	0.0039692
	scrSL3			730	12	148	4	1.82232
	scr5'CSE			2732	12	1066	0	0.315956
